# Supplementary material for: Corn peptides improved obesity-induced non-alcoholic fatty liver disease through relieving lipid metabolism, insulin resistance and oxidative stress
Source: Royal Society of Chemistry journal article supplement (doi:10.1039/d2fo00199c), 2022-01-01
Supplement: d2fo00199c1.pdf [file d2fo00199c1.pdf]

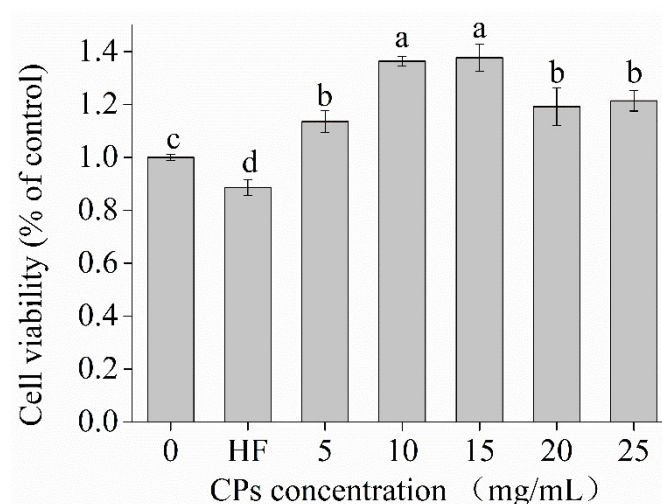

Fig. S1 Effects of CPs on LO2 cell viability. HF means cells pretreated with high concentration glucose (5mM).

Mean values with different letters (a, b....) were significantly different in experiment ( $p < 0.05$ ).
